# Supplementary material for: ISU FLUture: a veterinary diagnostic laboratory web-based platform to monitor the temporal genetic patterns of Influenza A virus in swine
Source: Springer Nature journal article supplement (doi:10.1186/s12859-018-2408-7), 2018-10-31

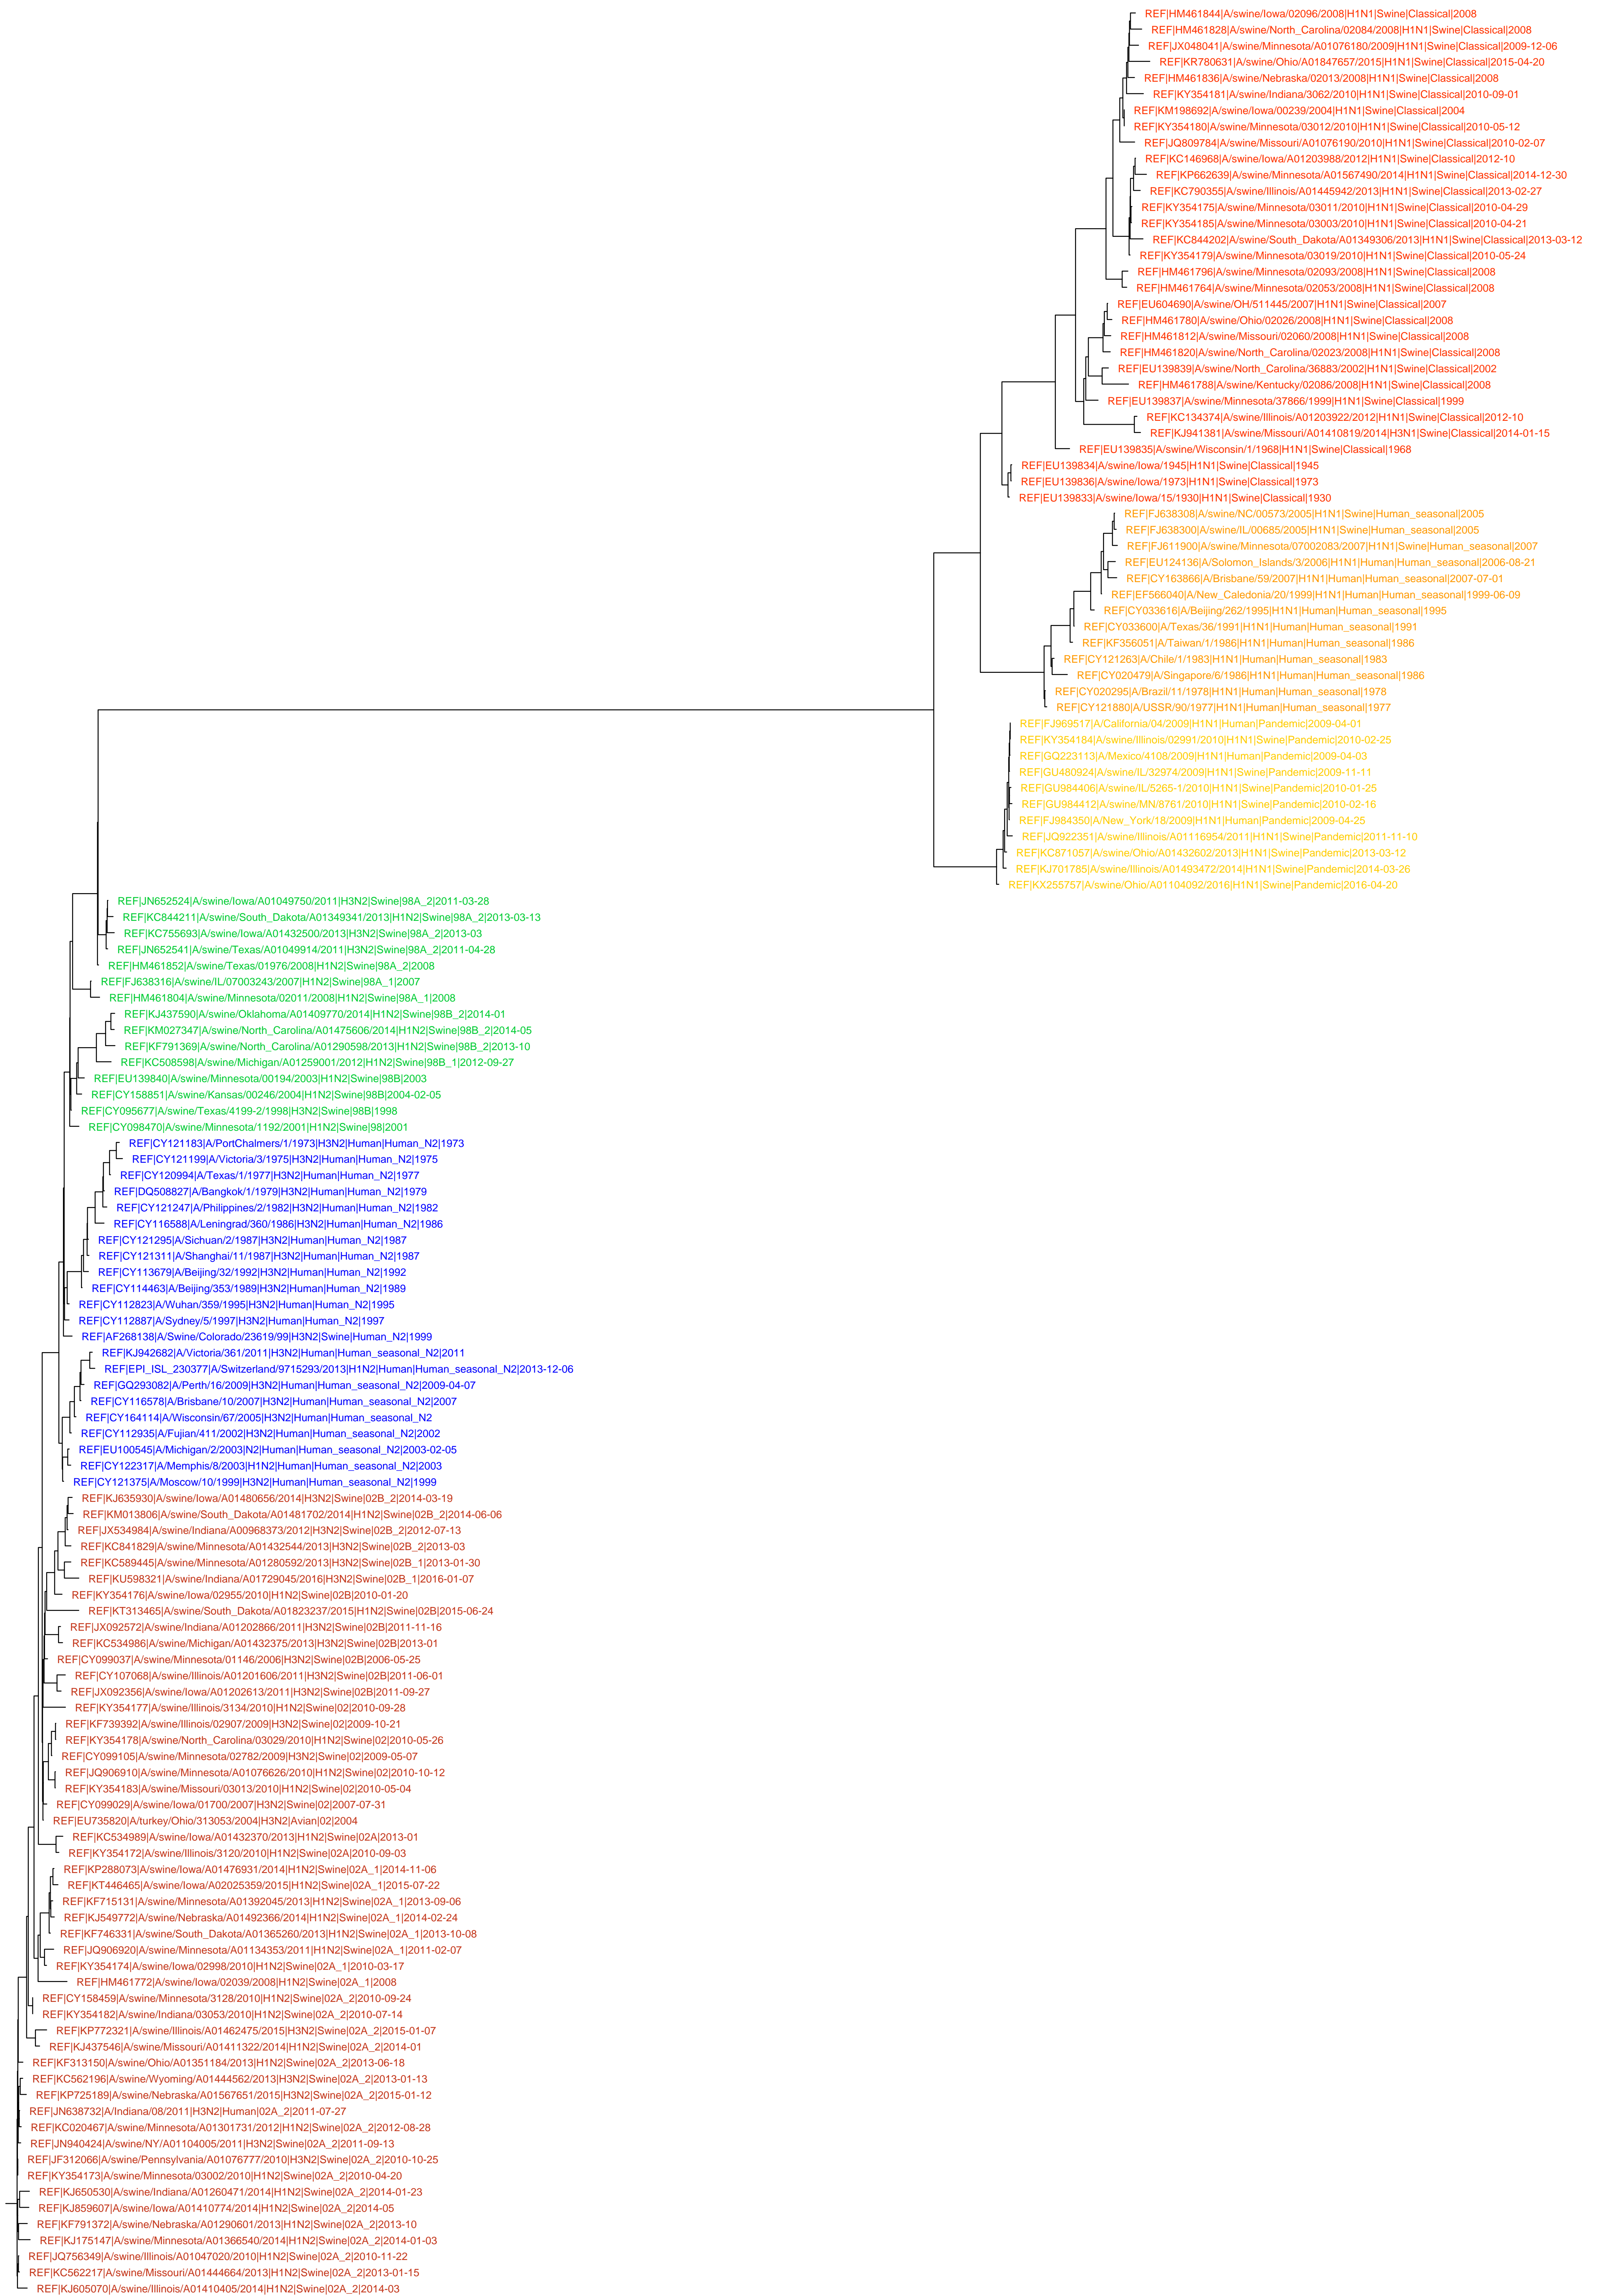

Supplement: 12859_2018_2408_MOESM1_ESM.pdf [file 12859_2018_2408_MOESM1_ESM.pdf]
